# Supplementary material
Source: publisher figshare collection journal article supplement (https://acs.figshare.com/ndownloader/files/6100488)
Supplement: Supplementary file 1 [file 6100488]

## Supporting Information

### Controlled growth of nanostructured biotemplates with cobalt and nitrogen co-doping as a binderless, lithium-ion battery anode

Tyler M. Huggins<sup>†</sup>, Justin M. Whiteley<sup>‡</sup>, Corey T. Love<sup>Ω</sup>, Kwangwon Lee<sup>Δ</sup>, Se-Hee Lee<sup>‡</sup>, Zhiyong Jason Ren<sup>\*†</sup>, and Justin C. Biffinger<sup>\*Ω</sup>

<sup>†</sup>*Department of Civil, Environmental, and Architectural Engineering, University of Colorado Boulder, Boulder, CO, 80309, USA*

<sup>‡</sup>*Department of Mechanical Engineering, University of Colorado Boulder, Boulder, CO, 80309, USA*

<sup>Ω</sup>*Chemistry Department, US Naval Research Laboratory, Washington DC., 20375, USA*

<sup>Δ</sup>*Department of Biology, Rutgers University, Camden, NJ 08102, USA.*

Corresponding Authors email addresses: [Justin.biffinger@nrl.navy.mil](mailto:Justin.biffinger@nrl.navy.mil); [Jason.ren@colorado.edu](mailto:Jason.ren@colorado.edu)

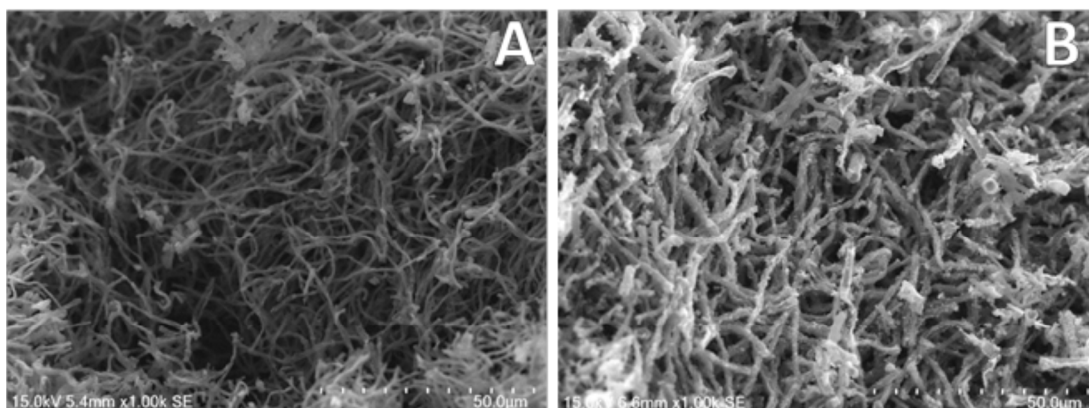

**Figure S1** SEM images of fungal mats and mycelia structure from (A) NO-40, (B) FCCE-S.

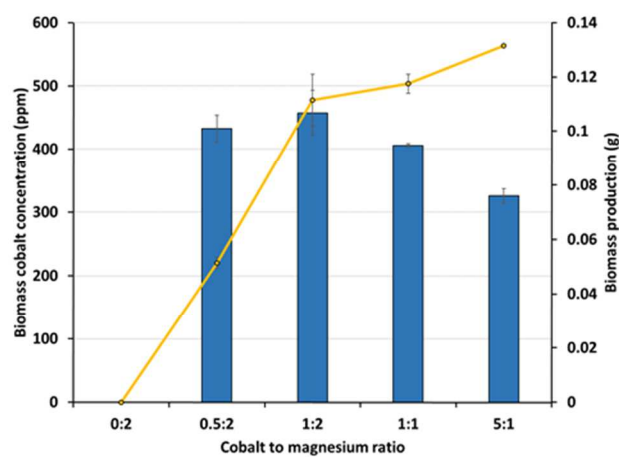

**Figure S2** Cobalt concentration (bar) and biomass production (line) of 48 h *N. crassa* cultures grown in different molar concentrations of Co and Mg.

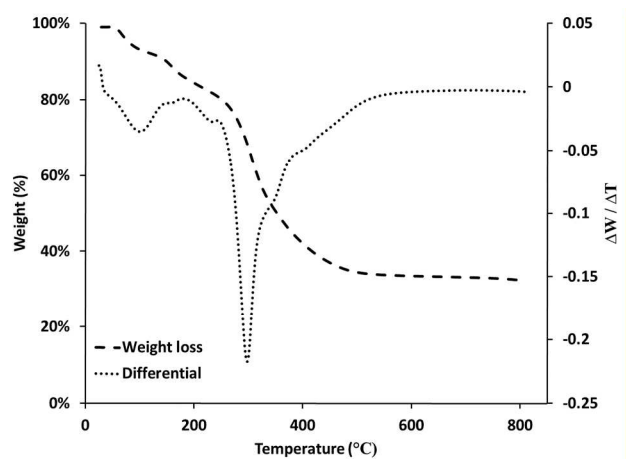

**Figure S3** Weight loss and differential data from the pyrolysis of fungal mats of *N. crassa* grown at 20°C min<sup>-1</sup>.

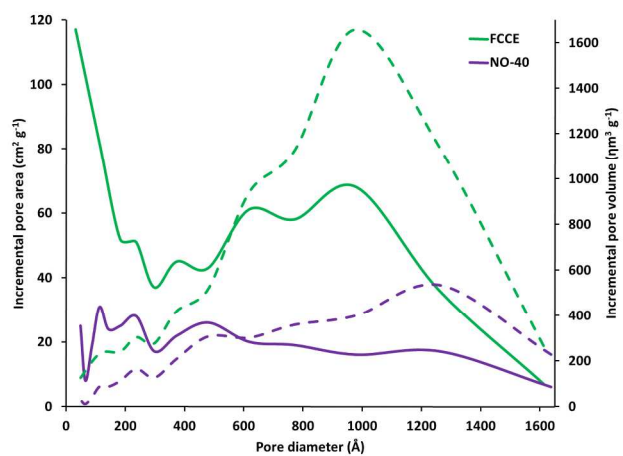

**Figure S4** Incremental pore volume (dashed) and incremental pore area (solid) for FCCE and NO-40 electrode materials.

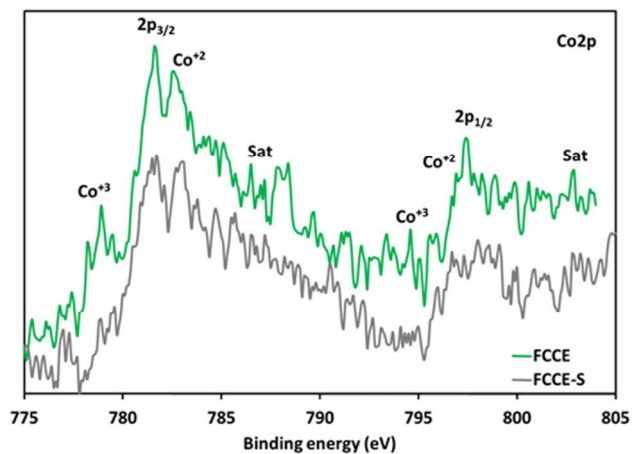

**Figure S5** XPS spectra for Co2p transition from graphitic electrodes generated from fungal mats cultured with 10 mM  $\text{Co}(\text{NO}_3)_2$  (FCCE) and autoclaved fungal mats soaked with  $\text{Co}(\text{NO}_3)_2$  (FCCE-S).

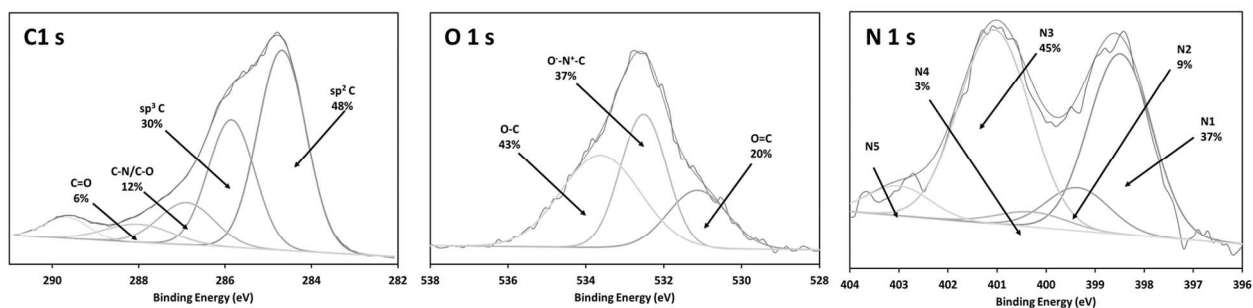

**Figure S6** XPS spectra for FCCE-S. N 1S labels are N1: pyridinic; N2: amine or imine; N3: pyrrolic; N4: quaternary; N5: pyridinic-N-oxide.

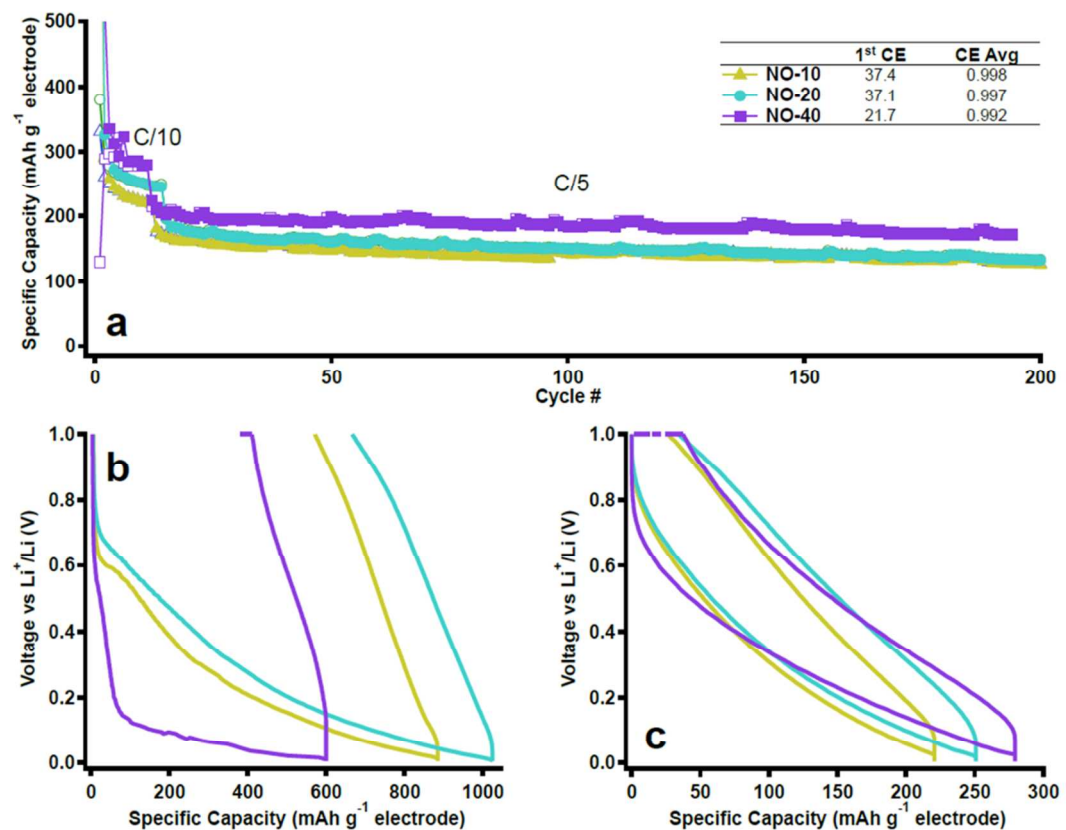

**Figure S7** (a) Cycling behavior of three samples without lyophilization. Voltage ranges is 0.005 – 1V. 1<sup>st</sup> cycle CE and long cycling average CE is displayed in table. (b) 1<sup>st</sup> cycle voltage profile of three samples. (c) 10<sup>th</sup> cycle voltage profile of three samples.
